# Supplementary material for: Tanshinone IIA sulfonate protects against cigarette smoke-induced COPD and down-regulation of CFTR in mice
Source: PubMed Central journal article supplement (PMC5762644; doi:10.1038/s41598-017-18745-5), 2018-01-10
Supplement: 41598_2017_18745_MOESM1_ESM.pdf [file 41598_2017_18745_MOESM1_ESM.pdf]

## Supplementary information

### **Tanshinone IIA sulfonate protects against cigarette smoke-induced COPD and down-regulation of CFTR in mice**

Defu Li<sup>1\*</sup>, Jian Wang<sup>1\*</sup>, Dejun Sun<sup>4\*</sup>, Xuefang Gong<sup>1</sup>, Hua Jiang<sup>1</sup>, Jiaze Shu<sup>1</sup>, Ziyi Wang<sup>1</sup>, Zhen Long<sup>1</sup>, Yiguan Chen<sup>5</sup>, Zili Zhang<sup>1</sup>, Liang Yuan<sup>1</sup>, Ruijuan Guan<sup>1</sup>, Xue Liang<sup>1</sup>, Ziyang Li<sup>1</sup>, Hongwei Yao<sup>1,6</sup>, Nanshan Zhong<sup>1</sup>, Wenju Lu<sup>1, 2, 3§</sup>

<sup>1</sup>State Key Laboratory of Respiratory Diseases, Guangzhou Institute of Respiratory Disease, The First Affiliated Hospital, Guangzhou Medical University, Guangzhou, Guangdong, China; <sup>2</sup>Department of Laboratory Medicine, The First Affiliated Hospital, Guangzhou Medical University, Guangzhou, Guangdong, China; <sup>3</sup>Sino-French Hoffmann Immunology Institute, Guangzhou Medical University, Guangzhou, Guangdong, China; <sup>4</sup>Department of Respiratory Medicine, The People's Hospital of Inner Mongolia; <sup>5</sup>Faculty of Biology, Medicine and Health, University of Manchester, Manchester City, Britain; <sup>6</sup>Department of Molecular Biology, Cell Biology & Biochemistry, Brown University Warren Alpert Medical School, Providence, RI, USA.

**Running title:** TIIA inhibits cigarette smoke-induced COPD

\*These authors contributed equally to this article.

#### **§Correspondence:**

Wenju Lu, MD, PhD  
Professor of Respiratory Medicine  
State Key Lab of Respiratory Diseases  
The First Hospital of Guangzhou Medical University  
Rm501E, Building 16  
195 Dongfengxi Road, Guangzhou, China  
Email: wlu92@yahoo.com  
Tel: 86-20-83205040; Fax: 86-20-83205162  
Email: [wlu92@yahoo.com](mailto:wlu92@yahoo.com)

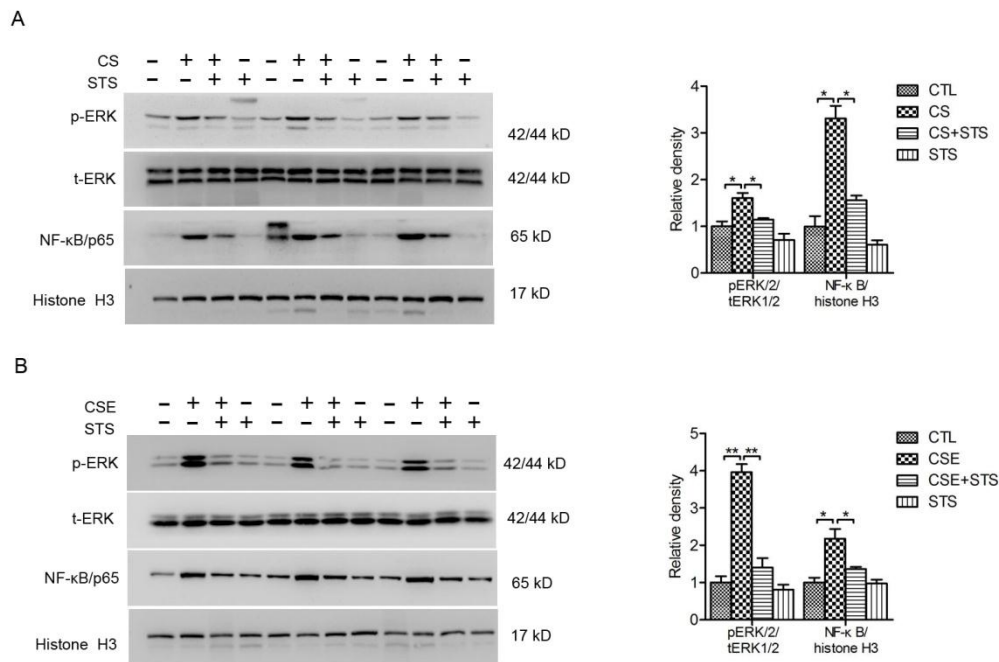

**Supplementary figure 1. STS reduces CS-induced activation of ERK/NF-κB pathway in 16HBE cells and mouse lungs.** (A) Levels of phosphorylated ERK1/2 in cytosol protein and levels of NF-κB in nuclear protein from lung tissue of mice exposed to CS with or without STS treatment. \* $P < 0.05$  and \*\* $P < 0.01$ ,  $n=3$ . CSE, cigarette smoke extract; CS, cigarette smoke. (B) 16HBE cells were treated with 2% CSE for 1 h with or without 2 h of STS pretreatment. Levels of ERK1/2 and phosphorylated ERK1/2 in cytosol protein and levels of NF-κB with histone H3 as loading control in nuclear protein. \* $P < 0.05$  and \*\* $P < 0.01$ . CFTR, cystic fibrosis transmembrane conductance regulator; CSE, cigarette smoke extract; CS, cigarette smoke; STS, Sodium tanshinone IIA sulfonate.

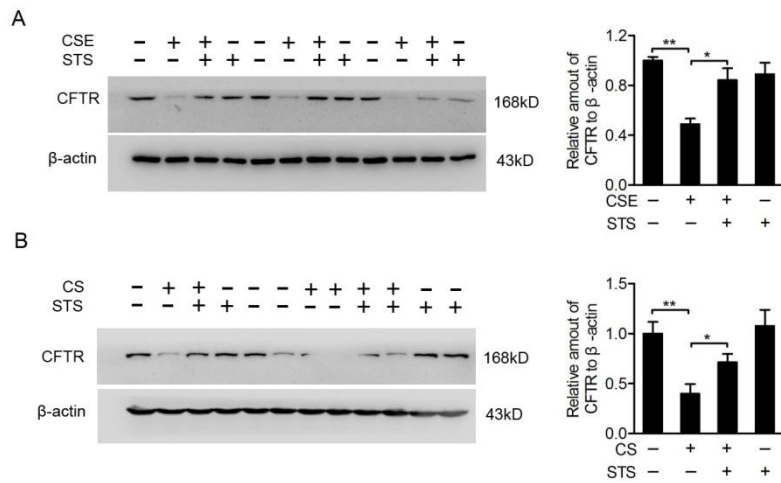

**Supplementary figure 2. STS protects against CS-induced reduction of CFTR in 16HBE cells and mouse lungs.** 16HBE cells were treated with 2 % CSE for 48 h with 2 h of STS (10  $\mu$ g/ml) pre-incubation. (A) The level of CFTR in total cell extract was determined with  $\beta$ -actin as internal control (n=4 per group). (B) Western blotting tested the impact of STS on CFTR expression in lungs from CTL, CS, CS plus STS (CS+STS) and STS-treated mice (n=6 mice per group). \*P< 0.05 and \*\*P< 0.01. CFTR, cystic fibrosis transmembrane conductance regulator; CSE, cigarette smoke extract; CS, cigarette smoke; STS, Sodium tanshinone IIA sulfonate.

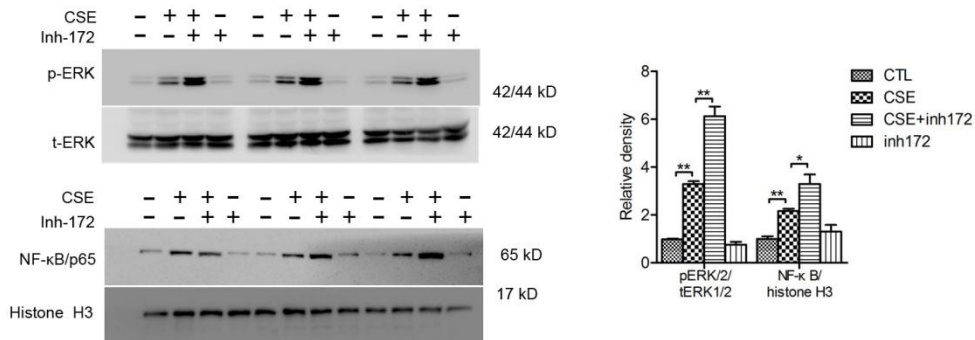

**Supplementary figure 3. CFTR inhibition increases CSE-induced activation in ERK/NF-κB pathway.** 16HBE cells were treated with 2% CSE for 1 h with 2 h of STS (10 μg/ml) pre-incubation. In order to inhibit CFTR function, cells were treated with CFTR specific inhibitor CFTR-Inh172 (10 μM) 1 h prior to STS treatment. The levels of phosphorylated ERK1/2 in cytosol protein were determined with ERK1/2 as internal control (n=3). The level of p65/NF-κB in nuclear extraction was determined with histone H3 as internal control (n=6). \*P < 0.05 and \*\*P < 0.01, CFTR, cystic fibrosis transmembrane conductance regulator; CSE, cigarette smoke extract; STS, Sodium tanshinone IIA sulfonate.
